# Supplementary material for: A facile synthetic route for the preparation of gold nanostars with magnetic cores and their reusable nanohybrid catalytic properties
Source: Royal Society of Chemistry journal article supplement (doi:10.1039/c0nr00704h), 2011-01-01
Supplement: c0nr00704h.pdf [file c0nr00704h.pdf]

## The Supporting Information

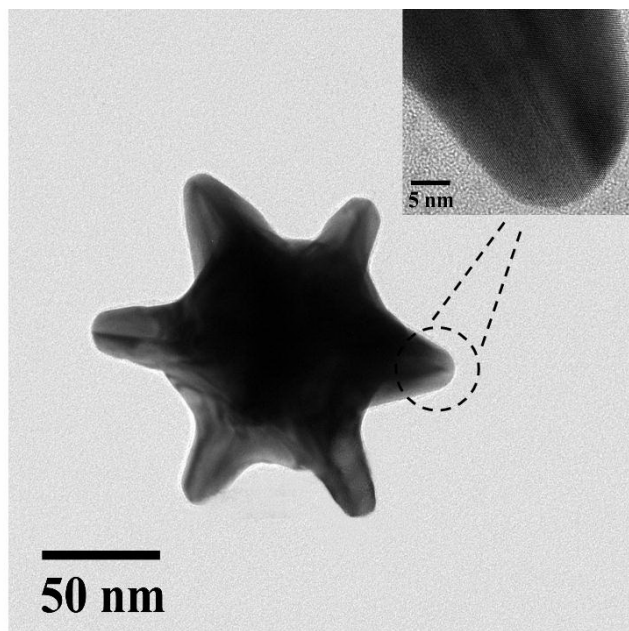

**Fig. S1.** The high-resolution TEM (HRTEM) image of a well-formed  $\text{Fe}_3\text{O}_4@\text{GNS}$

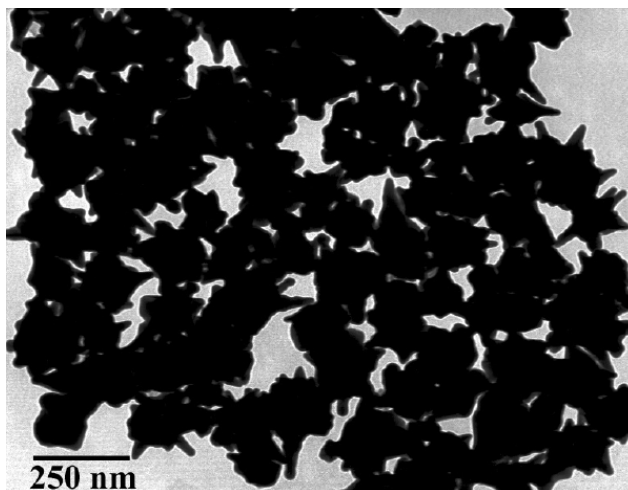

**Fig. S2.** TEM image of  $\text{Fe}_3\text{O}_4@\text{GNSs}$  after running for 6 cycles by magnetic separation.
